# Supplementary material for: A Rapid and Cost-Effective Identification of Invertebrate Pests at the Borders Using MinION Sequencing of DNA Barcodes
Source: MDPI journal article supplement (doi:10.3390/genes12081138), 2021-07-27
Supplement: s1 [file s1]

**Supplementary Table S3.** Cost-benefit versus time analysis comparing MinION sequencing to existing diagnostics.

|                     | <b>1 X Specimen</b> |               | <b>4 X Specimen</b> |               | <b>6 X Specimen</b> |               | <b>8 X Specimen</b> |               | <b>12 X Specimen</b> |               |
|---------------------|---------------------|---------------|---------------------|---------------|---------------------|---------------|---------------------|---------------|----------------------|---------------|
|                     | Time<br>(hrs)       | Cost<br>(AUD) | Time<br>(hrs)       | Cost<br>(AUD) | Time<br>(hrs)       | Cost<br>(AUD) | Time<br>(hrs)       | Cost<br>(AUD) | Time<br>(hrs)        | Cost<br>(AUD) |
| <b>Microscopic*</b> | 0.5                 | \$ 100.00     | 2                   | \$ 400.00     | 3                   | \$ 600.00     | 4                   | \$ 800.00     | 6                    | \$ 1200.00    |
| <b>Sanger</b>       | 120                 | \$ 74.86      | 120                 | \$ 170.83     | 120                 | \$ 234.81     | 120                 | \$ 298.79     | 120                  | \$ 426.75     |
| <b>MinION</b>       | 3.1                 | \$ 210.29     | 3.5                 | \$ 151.25     | 3.8                 | \$ 178.55     | 4                   | \$ 212.53     | 4.6                  | \$ 287.00     |

\*Average time estimate provided by DAWE entomologist noting time inputs varies between specimens.
