# Supplementary material for: A Rapid and Cost-Effective Identification of Invertebrate Pests at the Borders Using MinION Sequencing of DNA Barcodes
Source: MDPI journal article supplement (doi:10.3390/genes12081138), 2021-07-27
Supplement: s1 [file s1]

**Supplementary Table S2.** A side-by-side comparison of DNA barcode sequencing-based identification and the morphological identification of invertebrate specimens intercepted at the border.

| Number | Specimen ID | Developmental stage | Initial determination by microscopic methods | Barcode sequencing; The best blast hit in NCBI database | Sequence Identity (%) | NCBI Accession number | MiniON sequencing ID compared to morphological  |                                          |                                     |               |
|--------|-------------|---------------------|----------------------------------------------|---------------------------------------------------------|-----------------------|-----------------------|-------------------------------------------------|------------------------------------------|-------------------------------------|---------------|
|        |             |                     |                                              |                                                         |                       |                       | Support morphological ID to the taxonomic level | Family/genus level identification (≥90%) | Species level identification (≥97%) | Comments      |
| 1      | 411850      | Adult               | <i>Tyrophagus curvipenis</i>                 | <i>Tyrophagus curvipenis</i>                            | 97.29%                | KY986272.1            | Species                                         | Yes                                      | Yes                                 | Supported BDM |
| 2      | 1XXXX       | Adult               | <i>Tetranychus urticae</i>                   | <i>Tetranychus urticae</i>                              | 99.25%                | KJ729022.1            | Species                                         | Yes                                      | Yes                                 | Supported BDM |
| 3      | 4XXXX       | Adult               | <i>Tetranychus ludeni</i>                    | <i>Tetranychus ludeni</i>                               | 98.96%                | KJ729018.1            | Species                                         | Yes                                      | Yes                                 | Supported BDM |
| 4      | 2XXXX       | Adult               | <i>Tetranychus evansi</i>                    | <i>Aculops lycopersici</i>                              | 98.67%                | JX298841.1            | Order: Prostigmata                              | Yes                                      | Yes                                 | Improved BDM  |
| 5      | 359697      | Adult               | Acari (Sub-class)                            | <i>Phytoseiulus persimilis</i>                          | 97.47%                | KY271881.1            | Sub-class                                       | Yes                                      | Yes                                 | Improved BDM  |
| 6      | 396771      | Egg                 | Class: Arachnida                             | <i>Phytoseiulus persimilis</i>                          | 97.40%                | KY271881.1            | Class                                           | Yes                                      | Yes                                 | Improved BDM  |
| 7      | 393706_2    | Egg                 | Not detected                                 | <i>Haplothrips sp</i>                                   | 98.92%                | MG359779.1            | N/A                                             | Yes                                      | No                                  | Improved BDM  |
| 8      | 359688      | Egg                 | Arthropoda, possibly Insecta                 | <i>Phloeonomus punctipennis</i>                         | 97.19%                | JX626112.1            | Class                                           | Yes                                      | Yes                                 | Improved BDM  |
| 9      | 396687      | Egg                 | No ID                                        | <i>Signiphora flavella</i>                              | 98.93%                | MH456558.1            | N/A                                             | Yes                                      | Yes                                 | Improved BDM  |
| 10     | 411231      | Egg                 | Order: Blattodea                             | <i>Choristima sp</i>                                    | 99.24%                | HQ583912.1            | Order                                           | Yes                                      | No                                  | Improved BDM  |
| 11     | 397935      | Egg                 | Sub-class: Acari                             | <i>Coscinoptycha improbana</i>                          | 99.24%                | HQ921885.1            | Phylum: Arthropoda                              | Yes                                      | Yes                                 | Improved BDM  |
| 12     | 398164      | Egg                 | Sub-class: Acari                             | Order: Psocoptera sp                                    | 99.39%                | KM528369.1            | Phylum: Arthropoda                              | No                                       | No                                  | Improved BDM  |
| 13     | 393594      | Egg                 | Class: Arachnida                             | Order: Psocoptera sp                                    | 98.64%                | KM528369.1            | Phylum: Arthropoda                              | No                                       | No                                  | Improved BDM  |
| 14     | 401751-3    | Egg                 | No ID                                        | Order: Psocoptera sp                                    | 98.33%                | KM528369.1            | N/A                                             | No                                       | No                                  | Improved BDM  |
| 15     | 396687-1    | Adult               | Family: Tydeidae                             | Family: Tydeidae                                        | 95.25%                | KP979115.1            | Family                                          | Yes                                      | No                                  | Supported BDM |
| 16     | 396687-1    | Egg                 | Family: Tydeidae                             | Family: Tydeidae                                        | 95%                   | KP979115.1            | Family                                          | Yes                                      | No                                  | Supported BDM |

|    |          |       |                     |                            |        |            |                  |     |    |                              |
|----|----------|-------|---------------------|----------------------------|--------|------------|------------------|-----|----|------------------------------|
| 17 | 396687   | Nymph | Family: Tydeidae    | Family: Tydeidae           | 95.05% | KP979115.1 | Family           | Yes | No | Supported BDM                |
| 18 | 396687   | Nymph | Family: Tydeidae    | Family: Tydeidae           | 95.28% | KP979115.1 | Family           | Yes | No | Supported BDM                |
| 19 | 394401   | Egg   | Family: Tydeidae    | Family: Tydeidae           | 94.80% | KP979115.1 | Family           | Yes | No | Supported BDM                |
| 20 | 396677   | Nymph | Family: Tydeidae    | Family: Tydeidae           | 92.09% | KP979115.1 | Family           | Yes | No | Supported BDM                |
| 21 | 396677   | Nymph | Family: Tydeidae    | Family: Tydeidae           | 93.72% | KP979115.1 | Family           | Yes | No | Supported BDM                |
| 22 | 328988   | Egg   | Class: Insecta      | <i>Genus: Neonetus</i>     | 90.00% | MT011505.1 | Class            | Yes | No | Improved BDM                 |
| 23 | 336769-1 | Egg   | Family: Miridae     | <i>Genus: Diomocoris</i>   | 93.55% | MH359335.1 | Family           | Yes | No | Improved BDM                 |
| 24 | 358369-2 | Egg   | Family: Miridae     | <i>Genus: Diomocoris</i>   | 93.28% | MH359335.1 | Family           | Yes | No | Improved BDM                 |
| 25 | 358369-3 | Egg   | Family: Miridae     | <i>Genus: Diomocoris</i>   | 93.76% | MH359335.1 | Family           | Yes | No | Improved BDM                 |
| 26 | 396679   | Egg   | Family: Miridae     | <i>Genus: Diomocoris</i>   | 93.91% | MH359335.1 | Family           | Yes | No | Improved BDM                 |
| 27 | 400756-1 | Egg   | Family: Miridae     | <i>Genus: Diomocoris</i>   | 94.22% | MH359335.1 | Family           | Yes | No | Improved BDM                 |
| 28 | 400756-2 | Egg   | Family: Miridae     | <i>Genus: Diomocoris</i>   | 93.75% | MH359335.1 | Family           | Yes | No | Improved BDM                 |
| 29 | 341943   | Egg   | No ID               | <i>Genus: Diomocoris</i>   | 94.38% | MH359335.1 | N/A              | Yes | No | Improved BDM                 |
| 30 | 400756   | Egg   | No ID               | <i>Genus: Diomocoris</i>   | 94.08% | MH359335.1 | N/A              | Yes | No | Improved BDM                 |
| 31 | 397926   | Egg   | No ID               | <i>Genus: Poecilolycia</i> | 90.43% | HM374185.1 | N/A              | Yes | No | Improved BDM                 |
| 32 | 399630   | Egg   | No ID               | Order: Psocoptera          | 93.62% | KM528369.1 | N/A              | No  | No | Improved BDM                 |
| 33 | 398164   | Egg   | No ID               | <i>Genus: Xenylla</i>      | 94.68% | KT808349.1 | N/A              | Yes | No | Improved BDM                 |
| 34 | 375975   | Egg   | Class: Insecta      | <i>Genus: Brachycaudus</i> | 94.95% | KR037740.1 | Class            | Yes | No | Improved BDM                 |
| 35 | 376244   | Egg   | Class: Insecta      | <i>Genus: Ricania</i>      | 85.71% | MF621872.1 | Class            | No  | No | CMRR < 90% sequence identity |
| 36 | 338510   | Egg   | No ID               | <i>Genus: Neonetus</i>     | 89.17% | MT011505.1 | N/A              | No  | No | CMRR < 90% sequence identity |
| 37 | 412000   | Egg   | Class: Insecta      | <i>Genus: Thrips</i>       | 79.11% | KF144125.1 | Class            | No  | No | CMRR < 90% sequence identity |
| 38 | 399939   | Egg   | Family: Miridae     | Genus: Orius               | 84.71% | MG874953.1 | Order: Hemiptera | No  | No | CMRR < 90% sequence identity |
| 39 | 394787   | Egg   | Class: Arachnida    | <i>Genus: Phytoseiulus</i> | 88.86% | KY271881.1 | Class            | No  | No | CMRR < 90% sequence identity |
| 40 | 359694   | Adult | Order: Mesostigmata | Family: Melicharidae       | 81.78% | MF915504.1 | Order            | No  | No | CMRR < 90% sequence identity |

|    |          |       |                            |                              |        |            |                       |    |    |                              |
|----|----------|-------|----------------------------|------------------------------|--------|------------|-----------------------|----|----|------------------------------|
| 41 | 394406   | Adult | <i>Genus: Tarsonemus</i>   | Family: Tarsonemidae         | 84.05% | MG314339.1 | Family                | No | No | CMRR < 90% sequence identity |
| 42 | 396887   | Egg   | Sub-class: Acari           | <i>Genus: Triophtydeus</i>   | 82.83% | MG310675.1 | Sub-class             | No | No | CMRR < 90% sequence identity |
| 43 | 401751   | Egg-1 | Sub-class: Acari           | <i>Genus: Amblyseius</i>     | 81.34% | JX080327.1 | Sub-class             | No | No | CMRR < 90% sequence identity |
| 44 | 401650   | Adult | <i>Genus: Brachytydeus</i> | Family: Eupodidae            | 79.76% | JX834220.1 | Family                | No | No | CMRR < 90% sequence identity |
| 45 | 383726   | Egg   | Class: Arachnida           | <i>Genus: Phytoseiulus</i>   | 87.50% | KY271881.1 | Class                 | No | No | CMRR < 90% sequence identity |
| 46 | 401751   | Egg-2 | Sub-class: Acari           | Genus: Amblyseius            | 82.28% | JX080348.1 | Sub-class             | No | No | CMRR < 90% sequence identity |
| 47 | 396899-1 | Adult | Family: Tydeidae           | Family: Tydeidae             | 80.31% | KM837940.1 | Family                | No | No | CMRR < 90% sequence identity |
| 48 | 396899-2 | Adult | Family: Tydeidae           | Family: Tydeidae             | 80.03% | KM837940.1 | Family                | No | No | CMRR < 90% sequence identity |
| 49 | 396884   | Adult | Sub-order: Oribatida       | Family: Oribatulidae         | 82.25% | MG410173.1 | Order: Sarcoptiformes | No | No | CMRR < 90% sequence identity |
| 50 | 412151-1 | Adult | Sub-order: Oribatida       | Family: Oribatulidae         | 82.35% | MG410173.1 | Order: Sarcoptiformes | No | No | CMRR < 90% sequence identity |
| 51 | 412151-2 | Egg   | Sub-order: Oribatida       | Order: Sarcoptiformes        | 81.27% | KM623317.1 | Order: Sarcoptiformes | No | No | CMRR < 90% sequence identity |
| 52 | 396680   | Adult | Order: Sarcoptiformes      | Family: Oribatulidae         | 81.66% | MG410173.1 | Order                 | No | No | CMRR < 90% sequence identity |
| 53 | 412159-1 | Adult | <i>Genus: Reductobates</i> | Family: Oribatulidae         | 82.36% | KJ087519.1 | Family                | No | No | CMRR < 90% sequence identity |
| 54 | 412159-2 | Adult | Family: Oribatulidae       | Family: Oribatulidae         | 81.75% | KJ087519.1 | Family                | No | No | CMRR < 90% sequence identity |
| 55 | 412158   | Adult | No ID                      | <i>Family: Oribatellidae</i> | 80.55% | MN352316.1 | N/A                   | No | No | CMRR < 90% sequence identity |
| 56 | 410633-1 | Adult | <i>Genus: Reductobates</i> | Order: Sarcoptiformes        | 81.61% | KM623317.1 | Order                 | No | No | CMRR < 90% sequence identity |
| 57 | 410633-2 | Adult | No ID                      | <i>Genus: Oppiidae</i>       | 81.36% | MG947348.1 | N/A                   | No | No | CMRR < 90% sequence identity |

|    |          |       |                           |                               |        |            |                       |    |    |                              |
|----|----------|-------|---------------------------|-------------------------------|--------|------------|-----------------------|----|----|------------------------------|
| 58 | 393706_1 | Nymph | Order: Sarcoptiformes     | Order: Sarcoptiformes         | 82.41% | KM623317.1 | Order                 | No | No | CMRR < 90% sequence identity |
| 59 | 394408   | Adult | Sub-order: Oribatida      | Family: Eremaeidae            | 81.72% | MN347670.1 | Order: Sarcoptiformes | No | No | CMRR < 90% sequence identity |
| 60 | 396884   | Adult | Sub-order: Oribatida      | Family: Oribatulidae          | 81.94% | MG410173.1 | Order: Sarcoptiformes | No | No | CMRR < 90% sequence identity |
| 61 | 394854   | Adult | Order: Sarcoptiformes     | Family: Eremaeidae            | 81.97% | MN347670.1 | Order                 | No | No | CMRR < 90% sequence identity |
| 62 | 396774   | Nymph | Sub-order: Oribatida      | Order: Sarcoptiformes         | 80.28% | KM623317.1 | Order                 | No | No | CMRR < 90% sequence identity |
| 63 | 396677   | Egg   | Class: Arachnida          | <i>Genus: Amblyseius</i>      | 81.00% | MN359647.1 | Class                 | No | No | CMRR < 90% sequence identity |
| 64 | 394401   | Nymph | <i>Genus: Neocalvolia</i> | <i>Genus: Nycteridocaulus</i> | 85.82% | KU203210.1 | Sub Order: Astigmata  | No | No | CMRR < 90% sequence identity |
| 65 | 396686   | Nymph | Sub-order: Oribatida      | Order: Sarcoptiformes         | 80.86% | KM623317.1 | Order                 | No | No | CMRR < 90% sequence identity |
| 66 | 411835   | Adult | Sub-order: Oribatida      | Family: Oribatulidae          | 82.20% | MG410173.1 | Order: Sarcoptiformes | No | No | CMRR < 90% sequence identity |
| 67 | 396679   | Adult | Order: Sarcoptiformes     | <i>Genus: Nycteridocaulus</i> | 85.59% | KU203210.1 | Order                 | No | No | CMRR < 90% sequence identity |
| 68 | 342022   | Adult | Sub-order: Oribatida      | Super-family: Eremaeidae      | 81.94% | MN347670.1 | Sub-order             | No | No | CMRR < 90% sequence identity |
| 69 | 396678   | Adult | Order: Sarcoptiformes     | Family: Oribatulidae          | 81.86% | MG410173.1 | Order                 | No | No | CMRR < 90% sequence identity |
| 70 | 330873_1 | Adult | Sub-order: Oribatida      | <i>Genus: Peloribates</i>     | 83.31% | MN348941.1 | Sub-order             | No | No | CMRR < 90% sequence identity |
| 71 | 394792   | Adult | Sub- order: Oribatida     | Family: Oribatulidae          | 82.02% | MG410173.1 | Sub-order             | No | No | CMRR < 90% sequence identity |
| 72 | 330873_2 | Adult | Sub-order: Oribatida      | <i>Genus: Toxerodectes</i>    | 82.00% | KU203236.1 | Order: Sarcoptiformes | No | No | CMRR < 90% sequence identity |
| 73 | 396773   | Nymph | Sub-order: Oribatida      | Family: Eremaeidae            | 80.67% | MN347670.1 | Sub-order             | No | No | CMRR < 90% sequence identity |
| 74 | 394443   | Nymph | Order: Sarcoptiformes     | Family: Oribatulidae          | 80.41% | MG410173.1 | Order                 | No | No | CMRR < 90% sequence identity |

|    |          |       |                            |                              |        |            |                      |    |    |                              |
|----|----------|-------|----------------------------|------------------------------|--------|------------|----------------------|----|----|------------------------------|
| 75 | 393594   | Adult | Sub-order: Oribatida       | <i>Genus: Neoribates</i>     | 87.31% | MK015000.1 | Sub-order            | No | No | CMRR < 90% sequence identity |
| 76 | 323546   | Adult | Order: Sarcoptiformes      | Family: Eremaeidae           | 81.62% | MN347670.1 | Order                | No | No | CMRR < 90% sequence identity |
| 77 | 399949   | Adult | <i>Genus: Reductobates</i> | <i>Order: Sarcoptiformes</i> | 82.36% | KM623317.1 | Order                | No | No | CMRR < 90% sequence identity |
| 78 | 399629   | Adult | Sub-order: Oribatid        | <i>Genus: Zetomimus</i>      | 85.56% | MN353928.1 | Sub-order            | No | No | CMRR < 90% sequence identity |
| 79 | 342018-1 | Adult | Sub-order: Oribatida       | <i>Genus: Neoribates</i>     | 80.64% | MN360340.1 | Sub-order            | No | No | CMRR < 90% sequence identity |
| 80 | 342018-2 | Adult | Sub-order: Oribatida       | Family: Oribatulidae         | 82.5%  | KJ087519.1 | Sub-order            | No | No | CMRR < 90% sequence identity |
| 81 | 393594   | Adult | Sub-order: Oribatida       | Family: Oribatulidae         | 82.79% | MG410173.1 | Sub-order            | No | No | CMRR < 90% sequence identity |
| 82 | 399630   | Adult | Sub-order Oribatid         | <i>Genus: Eueremaeus</i>     | 82.89% | JX838540.1 | Sub-order            | No | No | CMRR < 90% sequence identity |
| 83 | 399618   | Adult | No ID                      | <i>Genus: Xolalgoides</i>    | 85.32% | KU203106.1 | N/A                  | No | No | CMRR < 90% sequence identity |
| 84 | 400552   | Adult | No ID                      | Family: Oribatulidae         | 81.78% | MG410173.1 | N/A                  | No | No | CMRR < 90% sequence identity |
| 85 | 399374   | Egg   | Class: Arachnida           | Family: Oribatulidae         | 81.76% | KJ087519.1 | Class                | No | No | CMRR < 90% sequence identity |
| 86 | 396890   | Adult | Sub-order: Oribatida       | Family: Oribatulidae         | 82.62% | KJ087519.1 | Sub-order            | No | No | CMRR < 90% sequence identity |
| 87 | 396772   | Adult | Sub-order: Oribatida       | Family: Oribatulidae         | 82.30% | KJ087519.1 | Sub-order            | No | No | CMRR < 90% sequence identity |
| 88 | 383727   | Adult | Sub-order: Oribatida       | Super family: Eremaeioidea   | 80.85% | MG417012.1 | Sub-order            | No | No | CMRR < 90% sequence identity |
| 89 | 396772   | Adult | Sub-order: Oribatida       | Family: Oribatulidae         | 82.07% | MG410173.1 | Sub-order            | No | No | CMRR < 90% sequence identity |
| 90 | 358910   | Adult | Family: Oribatulidae       | Family: Oribatulidae         | 82.62% | KJ087519.1 | Family: Oribatulidae | No | No | CMRR < 90% sequence identity |
| 91 | 393594   | Adult | Sub-order: Oribatida       | Order: Sarcoptiformes        | 82.48% | KM623317.1 | Order                | No | No | CMRR < 90% sequence identity |

Document title here

|     |          |       |                                       |                          |        |            |                            |    |    |                              |
|-----|----------|-------|---------------------------------------|--------------------------|--------|------------|----------------------------|----|----|------------------------------|
| 92  | 383727-1 | Adult | Sub-order:<br>Oribatida               | Family: Oribatulidae     | 82.77% | KJ087608.1 | Sub-order                  | No | No | CMRR < 90% sequence identity |
| 93  | 383727-2 | Adult | Sub-order:<br>Oribatida               | Family: Oribatulidae     | 83.59% | MG410173.1 | Sub-order                  | No | No | CMRR < 90% sequence identity |
| 94  | 396772   | Adult | Sub-order:<br>Oribatida               | Order: Sarcoptiformes    | 81.71% | KM834060.1 | Order                      | No | No | CMRR < 90% sequence identity |
| 95  | 342007   | Adult | Sub-order:<br>Oribatida               | Order: Sarcoptiformes    | 81.92% | KM623317.1 | Order                      | No | No | CMRR < 90% sequence identity |
| 96  | 396771   | Adult | Order:<br>Sarcoptiformes              | <i>Genus: Neoribates</i> | 87.10% | MK015000.1 | Order                      | No | No | CMRR < 90% sequence identity |
| 97  | 342018   | Adult | Sub-order:<br>Oribatida               | Family: Oribatulidae     | 82.46% | KJ087519.1 | Sub-order                  | No | No | CMRR < 90% sequence identity |
| 98  | 412151   | Adult | Sub-order:<br>Oribatida               | Family: Oribatulidae     | 82.77% | KJ087519.1 | Sub-order                  | No | No | CMRR < 90% sequence identity |
| 99  | S386142  | Egg   | Species:<br><i>Tetranychus evansi</i> | Family: Oribatulidae     | 82.24% | KJ087519.1 | Superorder:<br>Acariformes | No | No | CMRR < 90% sequence identity |
| 100 | 399630   | Adult | Sub-order: Oribatid                   | Family: Ascidae          | 82.68% | MG412078.1 | Sub-class:<br>Acari        | No | No | CMRR < 90% sequence identity |

BDM – Biosecurity Decision Making.

CMRR – Closest Matching Reference Record
