# Supplementary material for: A Rapid and Cost-Effective Identification of Invertebrate Pests at the Borders Using MinION Sequencing of DNA Barcodes
Source: MDPI journal article supplement (doi:10.3390/genes12081138), 2021-07-27
Supplement: s1 [file s1]

**Supplementary Table S1.** A side-by-side comparison of DNA barcode sequencing-based identification and the morphological identification of khapra beetle and thrips specimens intercepted at the border.

| Number | Specimen ID | Developmental stage | Initial determination by microscopic methods | Barcode sequencing; The best blast hit in NCBI database | Sequence Identity (%) | NCBI Accession number | MinION sequencing ID compared to morphological  |                                          |                                     |               |
|--------|-------------|---------------------|----------------------------------------------|---------------------------------------------------------|-----------------------|-----------------------|-------------------------------------------------|------------------------------------------|-------------------------------------|---------------|
|        |             |                     |                                              |                                                         |                       |                       | Support morphological ID to the taxonomic level | Family/genus level identification (≥90%) | Species level identification (≥97%) | Comments      |
| 1      | 274627      | Adult               | Trogoderma                                   | <i>Trogoderma variabile</i>                             | 98.48%                | MG458973.1            | Genus                                           | Yes                                      | Yes                                 | Improved BDM  |
| 2      | SA16011589  | Adult               | Trogoderma                                   | <i>Trogoderma anthrenoides</i>                          | 97.89%                | KP331485.1            | Genus                                           | Yes                                      | Yes                                 | Improved BDM  |
| 3      | 175479      | Adult               | Beetle                                       | <i>Trogoderma granarium</i>                             | 97.92%                | KP331467.1            | N/A                                             | Yes                                      | Yes                                 | Improved BDM  |
| 4      | 313163      | Adult               | <i>Trogoderma granarium</i>                  | <i>Trogoderma granarium</i>                             | 98.37%                | KP331467.1            | Species                                         | Yes                                      | Yes                                 | Supported BDM |
| 5      | 420106      | Adult               | <i>Franklinella occidentalis</i>             | <i>Franklinella occidentalis</i>                        | 98.05%                | MF993426.1            | Species                                         | Yes                                      | Yes                                 | Supported BDM |
| 6      | 398949      | Larva               | Thripidae                                    | <i>Franklinella occidentalis</i>                        | 98.39%                | HQ697596.1            | Family                                          | Yes                                      | Yes                                 | Improved BDM  |
| 7      | 423419      | Adult               | <i>Franklinella shultzei</i>                 | <i>Franklinella shultzei</i>                            | 98.05%                | KF778777.1            | Species                                         | Yes                                      | Yes                                 | Supported BDM |
| 8      | 320598      | Larva               | Thripidae                                    | <i>Frankliniella occidentalis</i>                       | 99.55%                | HQ697596.1            | Family                                          | Yes                                      | Yes                                 | Improved BDM  |
| 9      | 320599      | Larva               | Pupa                                         | <i>Frankliniella occidentalis</i>                       | 98.35%                | MF993426.1            | Family                                          | Yes                                      | Yes                                 | Improved BDM  |
| 10     | 420107      | Adult               | <i>Frankliniella occidentalis</i>            | <i>Frankliniella occidentalis</i>                       | 99.55%                | HQ697596.1            | Species                                         | Yes                                      | Yes                                 | Supported BDM |
| 11     | 423417      | Adult               | <i>Frankliniella occidentalis</i>            | <i>Frankliniella occidentalis</i>                       | 99.10%                | HQ697596.1            | Species                                         | Yes                                      | Yes                                 | Supported BDM |
| 12     | 320600      | Adult               | <i>Frankliniella occidentalis</i>            | <i>Frankliniella occidentalis</i>                       | 99.70%                | HQ697596.1            | Species                                         | Yes                                      | Yes                                 | Supported BDM |
| 13     | 111111      | Adult               | <i>Frankliniella schultzei</i>               | <i>Frankliniella schultzei</i>                          | 98.63%                | KP871483.1            | Species                                         | Yes                                      | Yes                                 | Supported BDM |

Document title here

|    |        |       |                                   |                                   |        |            |         |     |     |               |
|----|--------|-------|-----------------------------------|-----------------------------------|--------|------------|---------|-----|-----|---------------|
| 14 | 111111 | Adult | <i>Frankliniella schultzei</i>    | <i>Frankliniella schultzei</i>    | 98.25% | KC513059.1 | Species | Yes | Yes | Supported BDM |
| 15 | 222222 | Adult | <i>Frankliniella occidentalis</i> | <i>Frankliniella occidentalis</i> | 98.86% | KC513060.1 | Species | Yes | Yes | Supported BDM |
| 16 | 423417 | Adult | <i>Frankliniella occidentalis</i> | <i>Frankliniella occidentalis</i> | 97.68% | GQ343257.1 | Species | Yes | Yes | Supported BDM |

BDM – Biosecurity Decision Making.
